# Supplementary material
Source: publisher site journal article supplement (https://www.dovepress.com/article/347382)
Supplement: Supplementary file 1 [file get_supplementary_file.php]

# Vivity Study Data Entry

## Demographics Info

Site Name: \_\_\_\_\_

Name of the Surgeon: \_\_\_\_\_

Patient's Name (last, first): \_\_\_\_\_

Patient's Date of Birth: \_\_\_\_\_

Patient's Gender; Female  Male

Unique identifier (med rec #): \_\_\_\_\_

Patient's Phone Number: \_\_\_\_\_

Meets inclusion and exclusion criteria? Yes  No

Dominant eye: OD  OS

## Surgical Data

|                                        | RIGHT EYE                | LEFT EYE        |
|----------------------------------------|--------------------------|-----------------|
| Surgery date                           | ___/___/___              | ___/___/___     |
| Femtosecond laser? (circle)            | yes / no                 | yes / no        |
| Astigmatic incisions? (circle)         | yes / no                 | yes / no        |
| Target refraction                      |                          |                 |
| IOL model (include T#)                 |                          |                 |
| IOL power                              | + ____ . ____ D          | + ____ . ____ D |
| Stable postop manifest refraction date | ___/___/___              | ___/___/___     |
| Stable postop BCVA                     | 20/ _____                | 20/ _____       |
| PCO grade (circle)                     | 0 / trace / +1 / +2 / +3 |                 |
| Notes (if any)                         |                          |                 |

## Patient Questionnaire

1. Before surgery, what fears did you have? (Select all that apply):

- Going blind
- Needing Glasses after surgery
- Pain
- Having blurry vision
- Other (specify) \_\_\_\_\_

2. Overall, how satisfied are you with your vision after your latest surgery?

- Very satisfied
- Somewhat satisfied
- Neither satisfied nor dissatisfied
- Somewhat dissatisfied
- Very dissatisfied

3. How likely are you to refer a friend or family member for the same surgery?

- Very likely
- Somewhat likely
- Neither likely nor unlikely
- Somewhat unlikely
- Very unlikely

4. Have you already referred friends for the same surgery?

- Yes, all my Friends
- A few people
- One or Two
- No one

5. For what types of activities do you need glasses to see (other than sunglasses)?

- Driving -- if checked, complete Driving section below
- Reading (including fine print) -- if checked, complete Reading section below
- Seeing the computer monitor -- if checked, complete Computer section below
- Watching TV -- if checked, complete TV section below
- Sports/Hobbies -- if checked, complete Sports/Hobbies section below
- None of the above -- if only this box is checked, skip to

## **About Needing Glasses for Driving**

**(skip to next section if you answered question 5 from Patient questionnaire that you do not need glasses for driving)**

6. How often do you wear glasses for driving?

- Rarely
- Sometimes
- Frequently
- All the time

7. For what driving situation might you need glasses? (Select all that apply)

- Night driving
- Unfamiliar places
- Freeway driving
- Other (specify): \_\_\_\_\_

8. How much does it bother you that you need to wear glasses to drive?

- Not at all
- Just a little
- A fair amount
- Very much
- Extremely

## **About Needing Glasses for Reading**

***(skip to next section if you answered question 5 from Patient questionnaire that you do not need glasses for driving)***

9. How often do you wear glasses for reading?

- Rarely
- Sometimes
- Frequently
- All the time

10. For what reading situation might you need glasses? (Select all that apply)

- Fine print
- Dim light
- Prolonged reading
- Other (specify): \_\_\_\_\_

11. How much does it bother you that you need to wear glasses to read?

- Not at all
- Just a little
- A fair amount
- Very much
- Extremely

## **About Needing Glasses for Computer**

***(skip to next section if you answered question 5 from Patient questionnaire that you do not need glasses for driving)***

12. How often do you wear glasses to see the computer?

- Rarely
- Sometimes
- Frequently
- All the time

(continue to next page)

## Vivity Study Data Entry

13. For what computer situation might you need glasses? (Select all that apply)

- Reading text
- Watching videos
- Viewing photos
- Other (specify): \_\_\_\_\_

14. How much does it bother you that you need to wear glasses to see a computer monitor?

- Not at all
- Just a little
- A fair amount
- Very much
- Extremely

### **About Needing Glasses for TV**

**(skip to next section if you answered question 5 from Patient questionnaire that you do not need glasses for TV)**

15. How often do you wear glasses for watching TV?

- Rarely
- Sometimes
- Frequently
- All the time

16. For what TV situation might you need glasses? (Select all that apply)

- Seeing the captions
- Watching sports
- All TV watching requires glasses
- Other (specify): \_\_\_\_\_

17. How much does it bother you that you need to wear glasses to watch TV?

- Not at all
- Just a little
- A fair amount
- Very much
- Extremely

## **About Needing Glasses for Sports or Hobbies**

***(skip to next section if you answered question 5 from Patient questionnaire that you do not need glasses for sports or hobbies)***

18. What hobby activities require you to wear glasses (other than sunglasses) to see? (Check all that apply)

- Tennis  Golfing  
 Watching Sports  Playing cards  
 Other: \_\_\_\_\_

19. How much does it bother you that you need to wear glasses for sports/hobbies?

- Not at all  
 Just a little  
 A fair amount  
 Very much  
 Extremely

## **Glare and Haloes (for all patients)**

20. With or without glasses, how much do you notice glare or haloes around lights in dim light situations?

- Not at all  
 Just a little  
 A fair amount  
 Very much  
 Extremely

21. Did you know in advance you might see these glare and haloes?

- Yes, I remember very well being told in advance  
 Yes, I knew, but I didn't expect it to be so noticeable  
 No, I didn't know  
 N/A—I don't notice glare or haloes

## Choosing Your Surgeon and Implant (for all patients)

22. What made you choose your surgeon? (Check all that apply)

- |                                                                |                                                        |
|----------------------------------------------------------------|--------------------------------------------------------|
| <input type="checkbox"/> Recommended by a friend/family member | <input type="checkbox"/> Recommended by my optometrist |
| <input type="checkbox"/> Recommended by my primary care doctor | <input type="checkbox"/> Read about the doctor online  |
| <input type="checkbox"/> Insurance company referred me         | <input type="checkbox"/> A hospital referred me        |
| <input type="checkbox"/> Other (specify): _____                |                                                        |

23. What factors made you choose the type of lens implant you did, whether it was upgraded or standard? (Select all that apply)

- Cost
- Desire to see without corrective lenses
- Advice from friends
- Advice from doctors
- TV advertising
- Other (specify): \_\_\_\_\_

24. How likely would you be to choose the same lens again?

- Very likely
- Somewhat likely
- Neither likely nor unlikely
- Somewhat unlikely
- Very unlikely

25. For what kinds of activities is it most desirable for you to see without corrective lenses? (Select all that apply)?

- Driving
- Reading
- Sports (golf, tennis, biking, running, fishing)
- Parties and going out
- Hobbies
- Other

26. What, if anything, do you like about having had your surgery?

27. What, if anything, did you dislike about having had your surgery?
